# Supplementary material
Source: PubMed Central journal article supplement (PMC3699823)
Supplement: ASN.2012070739_ASN2012070739SupplementaryData.pdf [file ASN.2012070739_ASN2012070739SupplementaryData.pdf]

Supplementary Table. Baseline demographic, clinical and glomerular structural parameters of deceased patients.

|                                                                |               |
|----------------------------------------------------------------|---------------|
| Sex (male/female)                                              | 1/6           |
| Age (years)                                                    | 32.7 ± 8.3    |
| Age at onset (years)                                           | 12.0 ± 2.6    |
| Diabetes duration (years)                                      | 20.7 ± 7.8    |
| Follow-up (years)                                              | 4.8 ± 4.2     |
| Albumin excretion rate (µg/min)                                | 5.7 ± 2.8     |
| Glomerular filtration rate (ml/min/1.73m <sup>2</sup> )        | 96.3 ± 24.5   |
| Systolic blood pressure (mmHg)                                 | 120.3 ± 9.7   |
| Diastolic blood pressure (mmHg)                                | 78.0 ± 7.0    |
| Hypertension (yes/no)                                          | 4/3           |
| Retinopathy (yes/no/unknown)                                   | 2/2/3         |
| Hemoglobin A <sub>1c</sub> (%)                                 | 9.3 ± 1.6     |
| GBM width (nm)                                                 | 500.3 ± 119.2 |
| V <sub>v</sub> (Mes/glom)                                      | 0.29 ± 0.06   |
| V <sub>v</sub> (MM/glom)                                       | 0.16 ± 0.04   |
| V <sub>v</sub> (MC/glom)                                       | 0.09 ± 0.03   |
| S <sub>v</sub> (PGBM/glom) (µm <sup>2</sup> /µm <sup>3</sup> ) | 0.11 ± 0.01   |

Data are mean  $\pm$  SD or number of subjects with a given characteristic.

GBM: glomerular basement membrane;  $V_v(\text{Mes}/\text{glom})$ : mesangial fractional volume per glomerulus;  $V_v(\text{MM}/\text{glom})$ : mesangial matrix fractional volume per glomerulus;  $V_v(\text{MC}/\text{glom})$ : mesangial cell fractional volume per glomerulus;  $S_v(\text{PGBM}/\text{glom})$ : filtration surface density per glomerulus
